# Supplementary material for: Diversity and Distribution of Cyatholaimidae (Chromadorida: Nematoda): A Taxonomic and Systematic Review of the World Records
Source: Frontiers journal article supplement (doi:10.3389/fmars.2022.836670), 2022-03-18
Supplement: Table_2.XLSX [file Table_2.XLSX]

## Sheet: Sheet1
Supplementary table 2. Records of valid species of Cyatholaimidae with habitat occurence and realm, province and ecoregion distribution for marine species. In the case of continental slope and abyssal records, it was provided the ocean of occurence in the collum 'Realm or Ocean'. AZ: Abyssal Zone; BW: Brackish Water; CS: Continental Shelf; CZ: Coastal Zone; F: Freshwater; HW: Hypersaline Water; S…
Species	Realm or Ocean	Provinces	Ecoregions	Habitat	References
Acanthonchus (Acanthonchus) arcuatus	Temperate Northern Atlantic	Mediterranean Sea	Ionian Sea	CZ	Kreis 1926
Acanthonchus (Acanthonchus) cobbi	Temperate Northern Atlantic	Warm Temperate Northwest Atlantic	Northern Gulf of Mexico	CZ	Chitwood 1951
		Cold Temperate Northwest Atlantic	Virginian	BW	McCloskey 1970
	Tropical Atlantic	Tropical Northwestern Atlantic	Floridian	CZ	Hopper and Meyers 1966
			Greater Antilles	CZ	Armenteros et al. 2009a, Armenteros et al. 2014
	Central Indo-Pacific	Western Coral Triangle	Palawan/North Borneo	CZ	Long and Ross 1999, 2008
Acanthonchus (Acanthonchus) duplicatus	Temperate Northern Pacific	Cold Temperate Northeast Pacific	Puget Trough/Georgia Basin	CZ	Wieser 1959
			Northern California	CZ	Wright and Hope 1968
	Central Indo-Pacific	South China Sea	Southern China	CZ	Zhinan et al. 1997
Acanthonchus (Acanthonchus) setoi	Temperate Northern Pacific	Warm Temperate Northwest Pacific	Central Kuroshio Current	CZ	Wieser 1955
	Western Indo-Pacific	Central Indian Ocean Islands	Maldives	CS	Semprucci and Balsamo 2014
Acanthonchus (Acanthonchus) viviparus	Temperate Northern Pacific	Warm Temperate Northeast Pacific	Southern California Bight	CZ	Cobb 1920, Allgén 1947a
	Temperate Australasia	East Central Australian Shelf	Manning-Hawkesbury	CZ	Allgén 1951
	Temperate South America	Warm Temperate Southwestern Atlantic	Southeastern Brazil	CZ	Gerlach 1957a
	Tropical Atlantic	Gulf of Guinea	Gulf of Guinea South	CS	Gerlach 1957c
		Tropical Northwestern Atlantic	Greater Antilles	CS	Armenteros et al. 2009b
	Western Indo-Pacific	Red Sea and Gulf of Aden	Northern and Central Red Sea	CS	Gerlach 1964a, Riemann and Rachor 1972
Acanthonchus (Seuratiella) gracilis	Temperate Northern Atlantic	Northern European Seas	North Sea	CZ; CS	Ditlevsen 1919, 1922, Gerlach 1958
			Baltic Sea	CZ	Allgén 1929a, 1953
	Temperate Northern Pacific	Cold Temperate Northwest Pacific	Yellow Sea	CZ	Steiner 1921
	Tropical Eastern Pacific	Tropical East Pacific	Panama Bight	CZ	Allgén 1947a
Acanthonchus (Seuratiella) pugionatus	Northeast Atlantic Ocean	-	-	SL	Vitiello 1970
	Tropical Atlantic	Tropical Northwestern Atlantic	Greater Antilles	n.a.	Pérez-Garcia et al. 2020
Acanthonchus (Seuratiella) singaporensis	Central Indo-Pacific	Sunda Shelf	Malacca Strait	CZ	Chen et al. 2015
Acanthonchus (Seuratiella) rostratus	Temperate Northern Pacific	Cold Temperate Northeast Pacific	Puget Trough/Georgia Basin	CZ	Wieser 1959
	Tropical Atlantic	Tropical Northwestern Atlantic	Greater Antilles	n.a.	Pérez-Garcia et al. 2020
Acanthonchus (Seuratiella) tridentatus	Temperate Northern Pacific	Cold Temperate Northwest Pacific	Sea of Japan	CZ; CS	Kito 1976, 1982, Pavlyuk 2000
Biarmifer cochleatus	Temperate South America	Magellanic	Chiloense	CS	Wieser 1954a
Biarmifer dayi	Temperate Southern Africa	Benguela	Namaqua	CS	Inglis 1963
Biarmifer hopperi	Temperate Northern Pacific	Cold Temperate Northeast Pacific	Puget Trough/Georgia Basin	CZ	Sharma and Vincx 1982
Biarmifer laminatus	Temperate South America	Magellanic	Chiloense	CS	Wieser 1954a
Biarmifer madrynensis	Temperate South America	Magellanic	North Patagonian Gulfs	CZ	Pastor de Ward 2001
Biarmifer punctata	Temperate Northern Atlantic	Warm Temperate Northwest Atlantic	Northern Gulf of Mexico	CS	Jensen 1985
Craspodema octogoniata	Temperate Northern Atlantic	Mediterranean Sea	Western Mediterranean	CS; BW	Gerlach 1954, Deboutteville 1954, Boucher 1976, Nasri et al., 2015
Craspodema reflectans	Western Indo-Pacific	Central Indian Ocean Islands	Maldives	CS	Gerlach 1964b, Semprucci and Burattini 2015
	Temperate Northern Atlantic	Mediterranean Sea	Western Mediterranean	CS; CZ	Beyrem and Ayssa 1998, Boufahja et al. 2015
Cyatholaimus cirolanae	Temperate Northern Atlantic	Cold Temperate Northwest Atlantic	Scotian Shelf	Parasite	Adamson and Marcogliese 1994
Cyatholaimus gracilis	Temperate Northern Atlantic	Mediterranean Sea	Western Mediterranean	CZ; CS	Eberth 1863, de Man 1876, Wieser 1954b, Palacin 1985, Novak 1989
			Aegean Sea	CZ	Allgén 1941
			Adriatic Sea	CZ	Ott 1967, Semprucci 2013
		Northern European Seas	North Sea	CZ	de Man 1889, Steyaert et al. 2001, etc.
			Celtic Seas	CS; CZ	Southern 1914, Inglis 1961, Moore 1973
			Southern Norway	CZ	Allgén 1935
		Black Sea	Black Sea	CZ; HW	Filipjev 1918, Shadrin et al. 2019
	Western Indo-Pacific	Red Sea and Gulf of Aden	Northern and Central Red Sea	CZ	Riemann and Rachor 1972
Cyatholaimus microsetosus	Temperate Northern Atlantic	Mediterranean Sea	Western Mediterranean	CZ	Wieser 1954b
			Ionian Sea	CS	Mirto et al. 2014
Cyatholaimus minor	Central Indo-Pacific	South China Sea	Gulf of Tonkin	CZ	Gagarin 2012
Cyatholaimus ocellatus	Temperate Northern Atlantic	Northern European Seas	Celtic Seas	CZ	Bastian 1865
			North Sea	BW	Willems et al. 1984
	Western Indo-Pacific	West and South Indian Shelf	South India and Sri Lanka	BW	Kumary 2008
Cyatholaimus papilliferus	Temperate Northern Atlantic	Northern European Seas	Baltic Sea	CZ	Allgén 1929a
Cyatholaimus prinzi	Temperate Northern Atlantic	Mediterranean Sea	Western Mediterranean	CZ; BW	Marion 1870, Inglis 1961, Vitiello and Aissa 1985, Mahmoudi et al. 2002, etc.
		Lusitanian	South European Atlantic Shelf	CZ	Ditlevsen 1923
		Northern European Seas	North Sea	CZ	Schuurmans-Stekhoven and Adam 1931
	Western Indo-Pacific	Red Sea and Gulf of Aden	Northern and Central Red Sea	CZ	Hanafy et al. 2011
Cyatholaimus scarratti	Temperate Northern Atlantic	Northern European Seas	Celtic Seas	CZ	Inglis 1961
Cyatholaimus simulatus	Temperate Northern Atlantic	Northern European Seas	North Sea	CZ	Kreis 1924, Schuurmans-Stekhoven 1954
Cyathoshiva amaleshi	Western Indo-Pacific	Bay of Bengal	Northern Bay of Bengal	CZ	Datta et al. 2016
Isacanthonchus obesus	Central Indo-Pacific	South China Sea	Gulf of Tonkin	BW	Gagarin and Nguyen Vu Thanh 2008
Longicyatholaimus cervoides	Northeast Atlantic Ocean	-	-	SL	Vitiello 1970
Longicyatholaimus continus	Arctic Ocean	-	-	SL	Filipjev 1946
Longicyatholaimus egregius	Tropical Atlantic	Tropical Northwestern Atlantic	Floridian	CS	Hopper 1972
			Greater Antilles	CS	López-Canovas and Pastor de Ward 2006
Longicyatholaimus falcatus	Temperate Northern Atlantic	Mediterranean Sea	Western Mediterranean	BW	Vitiello 1971, Boufahja and Semprucci 2015
Longicyatholaimus longicaudatus	Temperate Northern Atlantic	Mediterranean Sea	Western Mediterranean	CS; BW	de Man 1876, Schuurmans-Stekhoven 1943, Palacin 1985, Novak 1989, Beyrem and Aissa 1998, Mahmoudi et al. 2002, etc.
			Adriatic Sea	CS	Vidakovic 1988
			Ionian Sea	CS	Mirto et al. 2014
		Northern European Seas	Southern Norway	CS	Allgén 1933
		Warm Temperate Northwest Atlantic	Northern Gulf of Mexico	CS	Jensen 1986
	Tropical Atlantic	Tropical Northwestern Atlantic	Greater Antilles	n.a.	Pérez-Garcia et al. 2020
Longicyatholaimus maldivarum	Western Indo-Pacific	Central Indian Ocean Islands	Maldives	CS	Gerlach 1964b, Semprucci and Balsamo 2014
Longicyatholaimus marilynae	Tropical Atlantic	Tropical Northwestern Atlantic	Floridian	CS	Hopper 1972
Longicyatholaimus minor	Temperate Australasia	East Central Australian Shelf	Manning-Hawkesbury	CZ	Cobb 1898
Longicyatholaimus orientalis	Central Indo-Pacific	South China Sea	Gulf of Tonkin	BW	Gagarin and Nguyen Vu Thanh 2015
Longicyatholaimus subtenuis	Central Indo-Pacific	South China Sea	Southern Vietnam	BW	Gagarin and Nguyen Vu Thanh 2007
Longicyatholaimus trichocauda	Tropical Eastern Pacific	Tropical East Pacific	Chiapas–Nicaragua	CZ	Gerlach 1955
Longicyatholaimus trichurus	Temperate Australasia	East Central Australian Shelf	Manning-Hawkesbury	CZ	Cobb 1898
Marylynnia annae	Tropical Atlantic	Tropical Northwestern Atlantic	Floridian	CS	Wieser and Hopper 1967, Hopper 1972
			Greater Antilles	CS	López-Canovas and Pastor de Ward 2006
	Central Indo-Pacific	South Kuroshio	South Kuroshio	CS	Kotta and Boucher 2001
	Temperate Australasia	Southwest Australian Shelf	Leeuwin	CS	Hourston et al. 2011
	Western Indo-Pacific	Central Indian Ocean Islands	Maldives	CS	Semprucci and Balsamo 2014
Marylynnia bellula	Northeast Atlantic Ocean	-	-	SL	Vitiello 1970
	Temperate Northern Atlantic	Mediterranean Sea	Western Mediterranean	CS; CZ	Beyrem and Aissa 1998, Boufahja et al. 2011
			Adriatic Sea	CS	Vidakovic 1988
Marylynnia choanolaimoides	Temperate Northern Atlantic	Mediterranean Sea	Western Mediterranean	CS; BW	Schuurmans-Stekhoven 1942, Mahmoudi et al. 2008
	Western Indo-Pacific	Red Sea and Gulf of Aden	Northern and Central Red Sea	CZ	Gerlach 1964a
Marylynnia complexa	Temperate Northern Atlantic	Northern European Seas	North Sea	CS	Warwick 1971b, Gee et al. 1985, Boyd et al. 2000, Schratzberger et al. 2007
			Celtic Seas	CS	Boyd et al. 2000
		Mediterranean Sea	Western Mediterranean	CS	Vitiello and Boucher 1971, Bovee 1988
			Adriatic Sea	CS	Vidakovic 1988
	Western Indo-Pacific	Bay of Bengal	Eastern India	CS	Annapurna et al. 2012
			Northern Bay of Bengal	BW	Ghosh et al. 2018
	Arctic	Arctic	North and East Barents Sea	CS	Krishnapriya et al. 2019
Marylynnia dubia	Arctic Ocean	-	-	SL	Filipjev 1946
Marylynnia effilatus	Temperate Northern Atlantic	Northern European Seas	Baltic Sea	CS	Schuurmans-Stekhoven 1946
Marylynnia eratos	Tropical Atlantic	Tropical Northwestern Atlantic	Floridian	CS	Hopper 1972
			Greater Antilles	n.a.	Pérez-Garcia et al. 2020
Marylynnia gerlachi	Western Indo-Pacific	Red Sea and Gulf of Aden	Northern and Central Red Sea	CS	Hopper 1972
	Central Indo-Pacific	Western Coral Triangle	Palawan/North Borneo	CZ	Long and Ross 1999, 2008
Marylynnia gracila	Temperate Northern Pacific	Cold Temperate Northwest Pacific	Yellow sea	CZ	Huang and Xu 2013
Marylynnia johanseni	Temperate Northern Atlantic	Warm Temperate Northwest Atlantic	Northern Gulf of Mexico	CS	Jensen 1985
	Tropical Atlantic	Tropical Northwestern Atlantic	Greater Antilles	n.a.	Pérez-Garcia et al. 2020
Marylynnia macrodentata	Temperate Northern Pacific	Cold Temperate Northeast Pacific	Puget Trough/Georgia Basin	CZ	Wieser 1959
Marylynnia mulsa	Tropical Atlantic	Tropical Northwestern Atlantic	Floridian	CS	Hopper 1972
	Temperate Northern Pacific	Warm Temperate Northwest Pacific	Central Kuroshio Current	CZ	Aryuthaka 1985
Marylynnia musharafii	Western Indo-Pacific	West and South Indian Shelf	Western India	CZ	Nasira et al. 2007, 2010, Salma et al. 2017
Marylynnia oculissoma	Tropical Atlantic	Tropical Northwestern Atlantic	Floridian	CS	Hopper 1972
			Greater Antilles	n.a.	Pérez-Garcia et al. 2020
	Temperate Northern Pacific	Warm Temperate Northwest Pacific	Central Kuroshio Current	CZ	Aryuthaka 1985
	Central Indo-Pacific	Northeast Australian Shelf	Central and Southern Great Barrier Reef	CS	Alongi and Christoffersen 1992
Marylynnia preclara	Tropical Atlantic	Tropical Northwestern Atlantic	Floridian	CS	Hopper 1972
	Temperate Northern Pacific	Warm Temperate Northwest Pacific	Central Kuroshio Current	CZ	Aryuthaka 1985
	Temperate Northern Atlantic	Warm Temperate Northwest Atlantic	Northern Gulf of Mexico	CS	Jensen 1986
		Mediterranean Sea	Adriatic Sea	BW	Leonardis et al. 2008
Marylynnia puncticaudata	Temperate Northern Atlantic	Mediterranean Sea	Western Mediterranean	BW; CZ	Boufahja and Beyrem 2014, Allouche et al. 2020, Wakkaf et al. 2020
Marylynnia stekhoveni	Temperate Northern Atlantic	Mediterranean Sea	Western Mediterranean	CZ; BW	Schuurmans-Stekhoven 1950, Palacin 1985, Mahmoudi et al. 2002, etc.
Marylynnia wieseri	Temperate Southern Africa	Benguela	Namaqua	CS	Inglis 1963
Metacyatholaimus adriaticus	Temperate Northern Atlantic	Mediterranean Sea	Adriatic Sea	CS	Vidakovic et al. 2003
Metacyatholaimus brevicollis	Temperate Australasia	East Central Australian Shelf	Manning-Hawkesbury	CZ	Cobb 1898
	Western Indo-Pacific	Central Indian Ocean Islands	Maldives	CS	Gerlach 1964b
Metacyatholaimus chabaudi	Southeast Atlantic Ocean	-	-	AZ	Gourbault 1980
	Tropical Atlantic	Tropical Northwestern Atlantic	Greater Antilles	CS	Armenteros et al. 2009b, Perez-Garcia et al. 2009
Metacyatholaimus cylindribucca	Temperate Northern Atlantic	Mediterranean Sea	Western Mediterranean	CS; BW	Schuurmans-Stekhoven 1950, Jouili et al. 2018
Metacyatholaimus delicatus	Southwest Pacific Ocean	-	-	SL	Leduc and Zhao 2016
Metacyatholaimus effilatus	Temperate Northern Atlantic	Mediterranean Sea	Western Mediterranean	CS	Bovee 1973, Bovee 1988
	Tropical Atlantic	Tropical Northwestern Atlantic	Greater Antilles	n.a.	Pérez-Garcia et al. 2020
Metacyatholaimus hirschi	Temperate Northern Atlantic	Mediterranean Sea	Western Mediterranean	CS	Schuurmans-Stekhoven 1942, 1950
Metacyatholaimus papillatus	Temperate Northern Atlantic	Mediterranean Sea	Adriatic Sea	CS	Vidakovic et al. 2003
Metacyatholaimus spatiosus	Temperate South America	Magellanic	Chiloense	CS	Wieser 1954a
	Temperate Northern Atlantic	Warm Temperate Northwest Atlantic	Carolinian	CS	Tietjen 1971
		Cold Temperate Northwest Atlantic	Virginian	CS	Tietjen 1977
	Northwest Atlantic Ocean	-	-	SL	Tietjen, 1976
Nannolaimoides armatus	Western Indo-Pacific	Central Indian Ocean Islands	Maldives	CS	Gerlach 1964b
Nannolaimoides decoratus	Temperate Northern Atlantic	Warm Temperate Northwest Atlantic	Carolinian	CZ	Ott 1972
		Mediterranean Sea	Western Mediterranean	CZ; BW	Palacín et al. 1992, Nasri et al. 2015
			Adriatic Sea	CS	Taheri et al. 2015
		Northern European Seas	Celtic Seas	CS	Boucher 1976
	Tropical Atlantic	Tropical Northwestern Atlantic	Bermuda	CZ	Gerlach 1977
	Temperate Australasia	Southwest Australian Shelf	Leeuwin	BW	Hourston et al. 2009
	Central Indo-Pacific	Western Coral Triangle	Palawan/North Borneo	CZ	Long and Ross 1999, 2008
Nannolaimoides effilatus	Temperate Northern Atlantic	Northern European Seas	North Sea	CS	Boucher 1976, Schratzberger et al. 2007
			Celtic Seas	BW	Lambshead 1986, Platt and Warwick 1988
		Cold Temperate Northwest Atlantic	Gulf of St. Lawrence–Eastern Scotian Shelf	BW	Tita et al. 1999
		Mediterranean Sea	Western Mediterranean	BW	Jouili et al. 2018
Paracanthonchus austrospectabilis	Temperate South America	Warm Temperate Southeastern Pacific	Humboldtian	CZ	Wieser 1954a
			Central Chile	CZ	Wieser 1954a
			Araucanian	CZ	Wieser 1954a
		Magellanic	Chiloense	CZ	Wieser 1954a
			Channels and Fjords of Southern Chile	CZ	Wieser 1954a
			Patagonian Shelf	BW	Pastor de Ward 1979
			North Patagonian Gulfs	CZ	Villares et al. 2016
	Tropical Atlantic	Tropical Northwestern Atlantic	Greater Antilles	n.a.	Pérez-Garcia et al. 2020
Paracanthonchus barka	Temperate Northern Atlantic	Mediterranean Sea	Western Mediterranean	CZ	Inglis 1962
	Western Indo-Pacific	Central Indian Ocean Islands	Maldives	CS	Semprucci and Balsamo 2014
Paracanthonchus batidus	Temperate South America	Warm Temperate Southwestern Atlantic	Southeastern Brazil	CZ	Gerlach 1957a
Paracanthonchus bipapillatus	Arctic	Arctic	North and East Barents Sea	CS	Kreis 1928
Paracanthonchus bothnicus	Temperate Northern Atlantic	Northern European Seas	Baltic Sea	CS	Schiemer et al. 1983
Paracanthonchus brevicaudatus	Central Indo-Pacific	South China Sea	Gulf of Tonkin	CZ	Gagarin and Nguyen Vu Thanh 2016
Paracanthonchus breviseta	Temperate Northern Atlantic	Mediterranean Sea	Western Mediterranean	CS	Schuurmans-Stekhoven 1950
	Tropical Atlantic	Tropical Northwestern Atlantic	Greater Antilles	CZ	Pérez-Garcia et al. 2015
Paracanthonchus bulbicola	Southeast Pacific Ocean	-	-	AZ	Bussau 1993
Paracanthonchus caecus	Temperate Northern Atlantic	Northern European Seas	North Sea	BW; CZ	De Man 1889, 1922, Ditlevsen 1919, De Coninck and Schuurmans-Stekhoven 1933, Vincx et al. 1982, Blome et al. 1999
			Baltic Sea	BW	Schneider 1927
		Mediterranean Sea	Western Mediterranean	CZ	Palacin 1985
		Black Sea	Black Sea	CZ; CS	Vorobyova et al. 2016, Sergeeva et al. 2021
		Cold Temperate Northwest Atlantic	Gulf of St. Lawrence–Eastern Scotian Shelf	BW	Tita et al. 2002
	Arctic	Arctic	White Sea	n.a.	Fedyaeva and Tchesunov 2017
			Northern Grand Banks–Southern Labrador	CZ	Reynolds and Finney-Crawley 1999
			North and East Barents Sea	CS	Krishnapriya et al. 2019
	Western Indo-Pacific	Bay of Bengal	Eastern India	CS	Bhanu et al. 2017
	Temperate Australasia	Southeast Australian Shelf	Western Bassian	BW	Nicholas et al. 1992
Paracanthonchus canadensis	Temperate Northern Pacific	Cold Temperate Northeast Pacific	Puget Trough/Georgia Basin	CZ	Vincx et al. 1982
Paracanthonchus cheynei	Temperate Australasia	Southwest Australian Shelf	Leeuwin	CZ	Inglis 1970
Paracanthonchus cochlearis	Temperate South America	Warm Temperate Southwestern Atlantic	Southeastern Brazil	CZ	Gerlach 1957a
Paracanthonchus cristatus	Temperate South America	Warm Temperate Southeastern Pacific	Araucanian	CZ	Wieser 1954a
Paracanthonchus denticulata	Temperate Northern Pacific	Warm Temperate Northwest Pacific	East China Sea	CS	Kim et al. 2015
Paracanthonchus duplicatus	Western Indo-Pacific	Central Indian Ocean Islands	Maldives	CS	Gerlach 1964b
		Red Sea and Gulf of Aden	Northern and Central Red Sea	n.a.	Riemann and Rachor 1972
Paracanthonchus elongatus	Temperate Northern Atlantic	Northern European Seas	North Sea	CZ; BW	de Man 1907, Allgén 1934, Bresslau and Schuurmans-Stekhoven 1940, Schuurmans-Stekhoven 1950, Gerlach 1953h, Capstick 1959
			Southern Norway	CZ	Allgén 1940
			South and West Iceland	CZ	De Coninck 1942
		Mediterranean Sea	Levantine Sea	CS	Schuurmans-Stekhoven 1943
Paracanthonchus filipjevi	Temperate Northern Atlantic	Black Sea	Black Sea	n.a.	Micoletzky 1924
		Mediterranean Sea	Western Mediterranean	CS	Schuurmars-Stekhoven 1950
Paracanthonchus gerlachi	Temperate Northern Atlantic	Northern European Seas	Southern Norway	CZ	Vincx et al. 1982
	Arctic	Arctic	North and East Barents Sea	CZ	Gerlach 1965
Paracanthonchus gynodiporata	Tropical Atlantic	Tropical Southwestern Atlantic	Northeastern Brazil	CZ	Oliveira et al. 2017
Paracanthonchus hartogi	Temperate Australasia	West Central Australian Shelf	Shark Bay	CS	Inglis 1970
	Temperate Northern Pacific	Cold Temperate Northwest Pacific	Sea of Japan	CZ	Lee et al 2016
Paracanthonchus hawaiiensis	Eastern Indo-Pacific	Hawaii	Hawaii	CS	Allgén 1951
	Temperate South America	Warm Temperate Southeastern Pacific	Humboldtian	CZ	Wieser 1954a
			Central Chile	CZ	Wieser 1954a
			Araucanian	CZ	Wieser 1954a
		Magellanic	Chiloense	CZ	Wieser 1954a
			Patagonian Shelf	BW	Pastor de Ward 1985
	Temperate Northern Pacific	Warm Temperate Northwest Pacific	Central Kuroshio Current	CZ	Wieser 1955
	Western Indo-Pacific	West and South Indian Shelf	Western India	n.a.	Turpeenniemi et al. 2001
Paracanthonchus heterocaudatus	Temperate Northern Pacific	Cold Temperate Northwest Pacific	Yellow sea	CZ	Huang and Xu 2013
Paracanthonchus heterodontus	Temperate Northern Atlantic	Northern European Seas	North Sea	CZ; BW; CS	Schulz 1932, Vincx et al. 1982, Willems et al. 1984, Soetaert et al. 1994, Boyd et al. 2000, Steyaert et al. 2007	31
			Celtic Seas	BW; CS	Somerfield et al. 1994, Boyd et al. 2000
		Mediterranean Sea	Western Mediterranean	CZ	Boufahja et al. 2016
Paracanthonchus kamui	Temperate Northern Pacific	Cold Temperate Northwest Pacific	Sea of Japan	CZ; CS	Kito 1981, 1982, Pavlyuk et al. 2007, Pavlyuk and Trebukhova 2005, Lee et al. 2016
Paracanthonchus kartanum	Temperate Australasia	Southwest Australian Shelf	South Australian Gulfs	CZ	Mawson 1953
			Leeuwin	CZ	Inglis 1970
Paracanthonchus latens	Southeast Atlantic Ocean	-	-	AZ	Gourbault 1980
Paracanthonchus lissus	Temperate Northern Atlantic	Mediterranean Sea	Levantine Sea	CS	Gagarin and Klerman 2008
Paracanthonchus longicaudatus	Temperate Northern Atlantic	Northern European Seas	North Sea	CS	Warwick 1971b, Lorenzen 1974, Jensen 1983, Austen and Widdicombe 1998, Ellis et al. 2011
			Celtic Seas	CS; CZ	Boyd et al. 2000, Somerfield et al. 2007
		Mediterranean Sea	Adriatic Sea	BW	Semprucci et al. 2014
	Western Indo-Pacific	Bay of Bengal	Eastern India	CS	Ansari et al. 2012, Annapurna et al. 2017, Bhanu et al. 2017
	Temperate Northern Pacific	Cold Temperate Northwest Pacific	Sea of Japan	CS	Belogurova and Maslennikov 2016
	Tropical Atlantic	Tropical Northwestern Atlantic	Greater Antilles	n.a.	Pérez-Garcia et al. 2020
Paracanthonchus longispiculum	Temperate South America	Magellanic	Patagonian Shelf	BW	Pastor de Ward 1985
Paracanthonchus macrodon	Temperate Northern Atlantic	Northern European Seas	North Sea	CZ	Ditlevsen 1919, Schulz 1932, Schuurmans-Stekhoven 1935
			Southern Norway	CS	Allgén 1933
		Mediterranean Sea	Ionian Sea	CS	Mirto et al. 2014
	Temperate Northern Pacific	Warm Temperate Northeast Pacific	Southern California Bight	CZ	Allgén 1947a
		Cold Temperate Northeast Pacific	Puget Trough/Georgia Basin	CZ	Wieser 1959
		Cold Temperate Northwest Pacific	Sea of Japan	CZ; CS; BW	Kito 1982, Pavlyuk et al. 2007, Pavlyuk and Trebukhova 2005, Lee et al. 2016, Milovankina et al. 2018
Paracanthonchus macrospiralis	Temperate South America	Magellanic	Channels and Fjords of Southern Chile	CS	Allgén 1959
Paracanthonchus major	Arctic	Arctic	North and East Barents Sea	CS	Kreis 1928
Paracanthonchus mamubiae	Northwest Pacific Ocean	-	-	AZ	Miljutina and Miljutin 2015
Paracanthonchus margaretae	Temperate Australasia	Southwest Australian Shelf	Leeuwin	CZ	Inglis 1970
Paracanthonchus medius	Arctic	Arctic	White Sea	CZ	Galtsova 1976
Paracanthonchus micoletzkyi	Temperate Northern Atlantic	Mediterranean Sea	Levantine Sea	CS	Schuurmans-Stekhoven 1943
			Adriatic Sea	CZ	Ott 1967
Paracanthonchus micropapillatus	Temperate South America	Warm Temperate Southeastern Pacific	Humboldtian	CZ	Wieser 1954a
		Magellanic	Chiloense	CZ	Wieser 1954a
			Channels and Fjords of Southern Chile	CZ	Wieser 1954a
Paracanthonchus miltommatus	Temperate Australasia	Southern New Zealand	Central New Zealand	CZ	Leduc and Zhao 2016
Paracanthonchus multisupplementatus	Central Indo-Pacific	South China Sea	Gulf of Tonkin	CZ; BW	Gagarin 2012, Pavlyuk et al. 2020
Paracanthonchus multitubifer	Western Indo-Pacific	Bay of Bengal	Northern Bay of Bengal	CZ	Timm 1961
Paracanthonchus mutatus	Temperate Northern Pacific	Cold Temperate Northeast Pacific	Puget Trough/Georgia Basin	CZ	Wieser 1959
Paracanthonchus nannodontus	Temperate Northern Atlantic	Northern European Seas	North Sea	CZ	Schulz 1932
Paracanthonchus olgae	Northern Atlantic Ocean	-	-	AZ	Tchesunov 2015
Paracanthonchus parahartogi	Central Indo-Pacific	Northeast Australian Shelf	Torres Strait Northern Great Barrier Reef	BW	Decraemer and Coomans 1978a
Paracanthonchus perspicuus	Temperate Northern Pacific	Cold Temperate Northwest Pacific	Sea of Japan	CZ	Kito 1981, 1982
	Tropical Atlantic	Tropical Northwestern Atlantic	Greater Antilles	n.a.	Pérez-Garcia et al. 2020
Paracanthonchus platti	Temperate Northern Atlantic	Northern European Seas	Celtic Seas	CZ	Vadhyar 1980
			North Sea	CS	Schratzberger et al. 2007
	Western Indo-Pacific	Bay of Bengal	Eastern India	CS	Ansari et al. 2012
Paracanthonchus platypus	Tropical Atlantic	Tropical Northwestern Atlantic	Floridian	CS	Wieser and Hopper 1967, Hopper and Meyers 1967
			Greater Antilles	CZ	Pérez-Garcia et al. 2015
Paracanthonchus quinquepapillatus	Temperate Northern Pacific	Cold Temperate Northeast Pacific	Puget Trough/Georgia Basin	CZ	Wieser 1959
Paracanthonchus ruens	Temperate South America	Magellanic	Channels and Fjords of Southern Chile	CZ	Wieser 1954a
Paracanthonchus sabulicolus	Temperate Northern Atlantic	Northern European Seas	North Sea	BW	Bouwman 1981
Paracanthonchus sandspitensis	Western Indo-Pacific	West and South Indian Shelf	Western India	CZ	Nasira et al. 2007, 2010
Paracanthonchus sonadiae	Western Indo-Pacific	Bay of Bengal	Northern Bay of Bengal	CZ	Timm 1961
Paracanthonchus stateni	Temperate South America	Magellanic	Channels and Fjords of Southern Chile	CZ	Allgén 1930, Wieser 1954a
Paracanthonchus stekhoveni	Temperate Northern Atlantic	Mediterranean Sea	Western Mediterranean	CZ	Schuurmans-Stekhoven 1950
			Adriatic Sea	BW	Leonardis et al. 2008
Paracanthonchus steueri	Western Indo-Pacific	Red Sea and Gulf of Aden	Northern and Central Red Sea	CZ	Micoletzky 1922
	Temperate Northern Atlantic	Mediterranean Sea	Western Mediterranean	CZ; CS	Wieser 1954b, Novak 1989
Paracanthonchus sunesoni	Temperate Northern Atlantic	Mediterranean Sea	Western Mediterranean	CZ	Allgén 1942, Wieser 1954b
	Tropical Atlantic	Tropical Northwestern Atlantic	Southern Caribbean	n.a.	Allgén 1947b
	Western Indo-Pacific	Red Sea and Gulf of Aden	Northern and Central Red Sea	CS	Riemann and Rachor 1972
Paracanthonchus thaumasius	Temperate Northern Atlantic	Northern European Seas	North Sea	CS; BW; CZ	Schulz 1932, Willems et al. 1984, Vincx et al. 1990, Soetaert et al. 1994, Gheskiere et al. 2002, Schratzberger et al. 2007, etc.
Paracanthonchus tyrrhenicus	Temperate Northern Atlantic	Mediterranean Sea	Western Mediterranean	CZ	Brunetti 1949, Gerlach 1953d, f
		Northern European Seas	Celtic Seas	BW	Warwick 1971a
Paracanthonchus uniformis	Temperate Northern Atlantic	Mediterranean Sea	Western Mediterranean	CS	Schuurmans-Stekhoven 1950
Paracyatholaimoides asymmetricus	Temperate Northern Atlantic	Northern European Seas	Celtic Seas	CS	Boucher 1976
			North Sea	CS	Taheri et al. 2014
Paracyatholaimoides labiosetosus	Temperate Northern Atlantic	Northern European Seas	North Sea	BW	Riemann 1966
Paracyatholaimoides multispiralis	Temperate Northern Atlantic	Lusitanian	South European Atlantic Shelf	CZ	Gerlach 1953e
		Mediterranean Sea	Western Mediterranean	CZ	Gerlach 1953a, d, f
		Northern European Seas	Celtic Seas	CZ	Somerfield et al. 2007
			North Sea	CS	Ellis et al. 2011
	Tropical Atlantic	Tropical Northwestern Atlantic	Greater Antilles	n.a.	Pérez-Garcia et al. 2020
Paracyatholaimoides serpens	Temperate South America	Warm Temperate Southwestern Atlantic	Southeastern Brazil	CZ	Gerlach 1957a
Paracyatholaimus arcticus	Arctic	Arctic	North and East Iceland	CZ	Kreis 1963
Paracyatholaimus botosaneanui	-	-	-	S	Andrássy 1973
Paracyatholaimus chilensis	Temperate South America	Warm Temperate Southeastern Pacific	Central Chile	CZ	Gerlach 1953b
		Magellanic	Patagonian Shelf	BW; CZ	Pastor de Ward 1985, Pastor de Ward et al. 2015
			North Patagonian Gulfs	CZ	Villares et al. 2016
Paracyatholaimus comatus	Southeast Pacific Ocean	-	-	AZ	Bussau 1993
Paracyatholaimus diva	Southeast Atlantic Ocean	-	-	AZ	Tchesunov 2008
Paracyatholaimus dubiosus	Temperate Northern Atlantic	Northern European Seas	North Sea	CZ	Bütschli 1874, Allgén 1953, Gerlach 1953h
			Celtic Seas	CS	Southern 1914
			Baltic Sea	BW	Schneider 1927
		Mediterranean Sea	Western Mediterranean	BW	Meyl 1954
Paracyatholaimus helicellus	Temperate South America	Warm Temperate Southeastern Pacific	Central Chile	CZ	Wieser 1954a
		Magellanic	Chiloense	CZ	Wieser 1954a
	Tropical Atlantic	Tropical Northwestern Atlantic	Greater Antilles	CZ; CS	Armenteros et al. 2014, Ruiz-Abierno and Armenteros 2016
Paracyatholaimus huanghaiensis	Temperate Northern Pacific	Cold Temperate Northwest Pacific	Yellow sea	CZ	Huang and Xu 2013
Paracyatholaimus inglisi	Tropical Atlantic	Tropical Northwestern Atlantic	Floridian	CZ	Wieser and Hopper 1967
	Central Indo-Pacific	Northeast Australian Shelf	Torres Strait Northern Great Barrier Reef	BW	Decraemer ans Coomans 1978b
			Central and Southern Great Barrier Reef	BW	Alongi 1990
Paracyatholaimus intermedius	Temperate Northern Atlantic	Northern European Seas	North Sea	BW; CZ	de Man 1880, Gerlach 1953h, Riemann 1966, Lorenzen 1969
			Baltic Sea	BW; CZ	Schneider 1927, Gerlach 1953g
			Celtic Seas	BW	Warwick 1971a
	Arctic	Arctic	North and East Barents Sea	BW; CZ	Gerlach 1965
			North and East Iceland	CZ	Kreis 1963
	-	-	-	BW (salt marshes and springs in Germany inland)	Meyl 1955, Paetzold 1958
	-	-	-	S	Loof 1961, Nzeako et al. 2019
	-	-	-	F	Riemann 1966, Ocaña et al. 1990, Gusakov and Gagarin 2012, Gagarin and Nguyen Vu Thanh 2012
Paracyatholaimus occultus	Temperate Northern Atlantic	Northern European Seas	North Sea	CS; BW	Gerlach 1956, Willems et al. 1984, Lorenzen 1974, Schratzberger et al. 2007
			Celtic Seas	BW; CZ	Lambshead 1986, Boucher 1980, Somerfield et al. 2007
Paracyatholaimus papillatus	-	-	-	S	Vinciguerra and Orcelli 1997
Paracyatholaimus paramonovi	-	-	-	F	Gagarin 2004
Paracyatholaimus paucipapillatus	Tropical Eastern Pacific	Tropical East Pacific	Chiapas–Nicaragua	CZ	Gerlach 1955
	Temperate South America	Warm Temperate Southwestern Atlantic	Southeastern Brazil	CZ	Gerlach 1957a
		Warm Temperate Southeastern Pacific	Araucanian	BW	Murphy 1966
	Tropical Atlantic	Gulf of Guinea	Gulf of Guinea South	BW	Gerlach 1957c
Paracyatholaimus pentodon	Temperate Northern Atlantic	Northern European Seas	North Sea	BW; CZ; CS	Riemann 1966, Willems et al. 1984, Soetart et al. 1994, Gheskiere et al. 2002, Lorenzen 1974, Vincx et al. 1990, Schratzberger et al. 2007, Ellis et al. 2011
			Celtic Seas	CZ	Vadhyar 1980
Paracyatholaimus pesavis	Tropical Atlantic	Tropical Northwestern Atlantic	Floridian	CZ	Wieser and Hopper 1967
	Temperate Northern Atlantic	Warm Temperate Northwest Atlantic	Carolinian	CS	Tietjen 1971
	Northwest Atlantic Ocean	-	-	SL	Tietjen 1976
	-	-	-	HW	Warwick et al. 2002
Paracyatholaimus proximus	Temperate Northern Atlantic	Northern European Seas	North Sea	CZ; BW	Bütschli 1874, de Man 1922, Schuurmans-Stekhoven 1931, 1935, Otto 1936, Gerlach 1953h, Riemann 1966, Bouwman et al. 1984
			Celtic Seas	BW	Long 1990
			Baltic Sea	CZ	Allgén 1929b, Urban-Malinga et al. 2016
		Lusitanian	South European Atlantic Shelf	CZ	Deboutteville et al. 1954
Paracyatholaimus pugettensis	Temperate Northern Pacific	Cold Temperate Northeast Pacific	Puget Trough/Georgia Basin	CZ	Wieser and Hopper 1967, Sharma and Webster 1983
		Cold Temperate Northwest Pacific	Sea of Japan	BW	Zograf and Yushin 2004
	Temperate Northern Atlantic	Mediterranean Sea	Western Mediterranean	CS	Beyrem and Aissa 1998
Paracyatholaimus qingdaoensis	Temperate Northern Pacific	Cold Temperate Northwest Pacific	Yellow sea	CZ	Huang and Xu 2013
Paracyatholaimus quadriseta	Temperate South America	Magellanic	Chiloense	CS	Wieser 1954a
			Patagonian Shelf	BW	Pastor de Ward 1985
	Western Indo-Pacific	Red Sea and Gulf of Aden	Northern and Central Red Sea	CS	Gerlach 1964a
	Temperate Northern Atlantic	Cold Temperate Northwest Atlantic	Virginian	CS	Tietjen 1977
Paracyatholaimus rotundus	Western Indo-Pacific	Red Sea and Gulf of Aden	Northern and Central Red Sea	CZ	Gerlach 1964a
Paracyatholaimus saradi	Western Indo-Pacific	Red Sea and Gulf of Aden	Southern Red Sea	CZ	Gerlach 1967
Paracyatholaimus separatus	Temperate Northern Atlantic	Mediterranean Sea	Western Mediterranean	CS; CZ	Wieser 1954b, Novak 1989
Paracyatholaimus spinulosus	Temperate Northern Atlantic	Warm Temperate Northwest Atlantic	Northern Gulf of Mexico	CS	Jensen 1985
Paracyatholaimus ternus	Temperate South America	Magellanic	Chiloense	BW	Wieser 1954a
			Channels and Fjords of Southern Chile	BW	Wieser 1954a
		Warm Temperate Southwestern Atlantic	Southeastern Brazil	CZ	Gerlach 1957a
	-	-	-	F	Riemann 1970
Paracyatholaimus truncatus	-	-	-	F	Cobb 1914, Riemann 1970
Paracyatholaimus vancouverensis	Temperate Northern Pacific	Cold Temperate Northeast Pacific	Puget Trough/Georgia Basin	CZ	Sharma and Vincx 1982
Paracyatholaimus vitraeus	Temperate South America	Warm Temperate Southwestern Atlantic	Southeastern Brazil	BW	Gerlach 1957b
Paralongicyatholaimus complicatus	Temperate South America	Warm Temperate Southwestern Atlantic	Southeastern Brazil	CZ	Gerlach 1957a
Paralongicyatholaimus macramphis	Temperate Northern Atlantic	Northern European Seas	North Sea	CS	Lorenzen 1972
	Central Indo-Pacific	Western Coral Triangle	Palawan/North Borneo	CZ	Long and Ross 1999, 2008
	Tropical Atlantic	Tropical Northwestern Atlantic	Greater Antilles	n.a.	Pérez-Garcia et al. 2020
Paralongicyatholaimus mastigodes	Temperate Northern Atlantic	Mediterranean Sea	Western Mediterranean	CS; BW	Schuurmans-Stekhoven 1950, Jouili et al. 2018
Paralongicyatholaimus minutus	Temperate Northern Atlantic	Northern European Seas	North Sea	CS	Warwick 1971b, Lorenzen 1972, Jensen 1983, Boyd et al. 2000, Schratzberger et al. 2007
			Celtic Seas	CS	Boyd et al. 2000
		Mediterranean Sea	Aegean Sea	CS	Lampadariou and Eleftheriou 2018
	Western Indo-Pacific	West and South Indian Shelf	Western India	CS	Sajan and Damodaran 2007
		Bay of Bengal	Eastern India	BW; CS	Chinnadurai and Fernando 2007, Ansari et al. 2012
Paralongicyatholaimus zosterae	Temperate Northern Atlantic	Northern European Seas	Southern Norway	CS	Allgén 1933
			North Sea	CS	Gerlach 1958, Riemann 1966
Paramarylynnia filicaudata	Temperate Northern Pacific	Cold Temperate Northwest Pacific	Yellow sea	CS	Huang and Sun 2011
Paramarylynnia stenocervica	Temperate Northern Pacific	Cold Temperate Northwest Pacific	Yellow sea	CS	Huang and Sun 2011
Paramarylynnia subventrosetata	Temperate Northern Pacific	Cold Temperate Northwest Pacific	Yellow sea	CS	Huang and Zhang 2007
Phyllolaimus dentatus	Temperate Northern Pacific	Cold Temperate Northeast Pacific	Puget Trough/Georgia Basin	CZ	Wieser 1959
Phyllolaimus tridentatus	Temperate Northern Atlantic	Cold Temperate Northwest Atlantic	Virginian	CZ	Murphy 1963
Pomponema ammophilum	Temperate Northern Atlantic	Northern European Seas	North Sea	CS	Lorenzen 1972, 1974
			Celtic Seas	CS	Boucher 1976
Pomponema astrodes	Temperate Northern Atlantic	Northern European Seas	North Sea	CS	Lorenzen 1972
Pomponema clavicaudatum	Temperate Northern Atlantic	Northern European Seas	North Sea	CZ	Schuurmans Stekhoven 1935, Gerlach 1953h, 1958
	Tropical Atlantic	Tropical Northwestern Atlantic	Greater Antilles	CS	Pérez-Garcia et al. 2019
Pomponema compactum	Temperate Northern Atlantic	Northern European Seas	North Sea	CS	Lorenzen 1972, 1974
Pomponema concinnum	Temperate South America	Magellanic	Chiloense	CS	Wieser 1954a
	Tropical Atlantic	Tropical Northwestern Atlantic	Greater Antilles	n.a.	Pérez-Garcia et al. 2020
Pomponema coomansi	Temperate Northern Atlantic	Northern European Seas	North Sea	CS	Vincx 1981
Pomponema corniculata	Southeast Atlantic Ocean	-	-	AZ	Gourbault 1980
Pomponema cotylophorum	Arctic	Arctic	North and East Barents Sea	CZ	Steiner 1916
Pomponema debile	Temperate Northern Atlantic	Northern European Seas	North Sea	CS	Lorenzen 1972, Schratzberger et al. 2007
			Celtic Seas	CS	Boyd et al. 2000
	Eastern Indo-Pacific	Bay of Bengal	Eastern India	CS	Annapurna et al. 2017, Bhanu et al. 2017
Pomponema elegans	Temperate Northern Atlantic	Northern European Seas	North Sea	CS; CZ	Lorenzen 1972, Gheskiere et al. 2002
			Southern Norway	CZ	Allgén 1940
		Mediterranean Sea	Western Mediterranean	CS	Hedfi et al. 2007
Pomponema foeticolum	Temperate Northern Atlantic	Warm Temperate Northwest Atlantic	Carolinian	CZ	Ott 1972
Pomponema golikovi	Arctic	Arctic	White Sea	CS	Platonova 1988
Pomponema hastatum	Temperate Northern Atlantic	Warm Temperate Northwest Atlantic	Carolinian	CZ	Ott 1972
	Tropical Atlantic	Tropical Northwestern Atlantic	Greater Antilles	n.a.	Pérez-Garcia et al. 2020
Pomponema koesterae	Northeast Atlantic Ocean	-	-	AZ	Jensen 1992
Pomponema lineatum	Temperate Northern Atlantic	Mediterranean Sea	Western Mediterranean	CZ	Gerlach 1953a
Pomponema litorium	Temperate Northern Atlantic	Cold Temperate Northwest Atlantic	Virginian	CZ	Cobb 1920
Pomponema loticum	Temperate Northern Atlantic	Northern European Seas	North Sea	BW; CS	Riemann 1966, 1976, Vanaverbeke et al. 2002
Pomponema macrospirale	Temperate Northern Atlantic	Warm Temperate Northwest Atlantic	Carolinian	CZ; BW	Ott 1972, Eskin and Coull 1987
Pomponema mirabile	Temperate Northern Atlantic	Cold Temperate Northwest Atlantic	Virginian	CZ; CS	Cobb 1917, Pearse et al. 1942, Wieser 1960
Pomponema multipapillatum	Temperate Northern Atlantic	Black Sea	Black Sea	CS	Filipjev 1922, Mudie et al. 2020
		Northern European Seas	North Sea	CS; CZ	Warwick 1971b, Lorenzen 1972, Jensen 1983, Schratzberger et al. 2007, Gheskiere et al. 2002
			Celtic Seas	CZ	Boucher 1980
			Baltic Sea	CS	Schiemer et al. 1983
		Mediterranean Sea	Western Mediterranean	CS; CZ	Bovee 1988, Boufahja et al. 2011
			Adriatic Sea	CS	Vidakovic 1988
Pomponema polydontus	Temperate Northern Pacific	Cold Temperate Northeast Pacific	Oregon, Washington, Vancouver Coast and Shelf	CZ	Murphy 1963
	Eastern Indo-Pacific	Bay of Bengal	Eastern India	CZ	Rao and Ganapati 1968
	Temperate Northern Atlantic	Mediterranean Sea	Western Mediterranean	CS	Beyrem and Aissa 1998
	Central Indo-Pacific	Sunda Shelf	Sunda Shelf/Java Sea	BW	Chen et al. 2012
Pomponema proximamphidum	Southeast Atlantic Ocean	-	-	AZ	Tchesunov 2008
Pomponema reductum	Temperate Northern Atlantic	Northern European Seas	Celtic Seas	BW	Warwick 1970, 1971a
			North Sea	BW	Wall et al. 2002
Pomponema sedecima	Temperate Northern Atlantic	Northern European Seas	Celtic Seas	CZ; BW	Platt 1973, Kennedy 1994
			North Sea	CS	Schratzberger et al. 2007
		Mediterranean Sea	Western Mediterranean	CS	Beyrem and Aissa 1998
			Adriatic Sea	CZ	Semprucci 2013
		Cold Temperate Northwest Atlantic	Gulf of St. Lawrence–Eastern Scotian Shelf	BW	Tita et al. 1999
		Lusitanian	Azores Canaries Madeira	CZ	Elena et al. 2006
Pomponema segregatum	Temperate Northern Pacific	Cold Temperate Northeast Pacific	Puget Trough/Georgia Basin	CZ	Wieser 1959
	Temperate Northern Atlantic	Warm Temperate Northwest Atlantic	Carolinian	CS	Tietjen 1976
	Western Indo-Pacific	West and South Indian Shelf	Western India	CS	Sajan and Damodaran 2007
	Northwest Atlantic Ocean	-	-	SL	Tietjen 1976
Pomponema stomachor	Temperate South America	Magellanic	Chiloense	CZ; CS	Wieser 1954a
Pomponema syltense	Temperate Northern Atlantic	Northern European Seas	North Sea	CZ	Blome 1974
	Central Indo-Pacific	Sunda Shelf	Sunda Shelf/Java Sea	BW	Chen et al. 2012
Pomponema tautraense	Temperate Northern Atlantic	Northern European Seas	Southern Norway	CS	Allgén 1933, 1935
			North Sea	CS; BW	Gerlach 1958, Jensen 1983, Riemann 1966
			Celtic Seas	BW	Lambshead 1986
		Mediterranean Sea	Western Mediterranean	CZ	Boufahja et al. 2011
		Cold Temperate Northwest Atlantic	Virginian	CS	Tietjen 1977
	Temperate South America	Magellanic	Chiloense	CS	Wieser 1954a
		Magellanic	Patagonian Shelf	CZ	Pastor de Ward et al. 2015
		Warm Temperate Southwestern Atlantic	Southeastern Brazil	CZ	Gerlach 1957a
Pomponema tesselatum	Tropical Atlantic	Tropical Northwestern Atlantic	Floridian	CZ	Wieser and Hopper 1967
			Greater Antilles	n.a.	López-Canovas and Pastor de Ward 2006
	Eastern Indo-Pacific	Bay of Bengal	Eastern India	CS	Bhanu et al. 2017
Pomponema veronicae	Tropical Atlantic	Tropical Southwestern Atlantic	Eastern Brazil	CZ	Cidreira et al. 2019
Pomponema websteri	Temperate Northern Pacific	Cold Temperate Northeast Pacific	Puget Trough/Georgia Basin	CZ	Sharma and Vincx 1982
Praeacanthonchus cygnis	Temperate Australasia	Southwest Australian Shelf	Leeuwin	CZ	Inglis 1970
Praeacanthonchus inglisi	Temperate Northern Atlantic	Northern European Seas	Celtic Seas	CZ	Coles 1965, Somerfield et al. 2007
Praeacanthonchus kreisi	Temperate Northern Atlantic	Northern European Seas	North Sea	CZ	Allgén 1929b
			Southern Norway	CS	Allgén 1931, 1933
			Celtic Seas	CZ	Wieser 1951
		Mediterranean Sea	Western Mediterranean	BW	Boufahja and Semprucci 2015
	Temperate South America	Magellanic	Malvinas/Falklands	CS	Allgén 1959
			Channels and Fjords of Southern Chile	CS	Allgén 1959
	Southern Ocean	Scotia Sea	South Georgia	CS	Allgén 1959
	Southern Ocean	-	-	SL	Allgén 1959
Praeacanthonchus opheliae	Temperate Northern Atlantic	Northern European Seas	Celtic Seas	BW	Warwick 1970
			North Sea	BW	Moens et al. 2013
		Mediterranean Sea	Adriatic Sea	CZ	Semprucci 2013
Praeacanthonchus punctatus	Temperate Northern Atlantic	Northern European Seas	Celtic Seas	BW	Bastian 1865, Warwick 1971a, Warwick and Gee 1984, Kennedy 1994, Somerfield 1994
			North Sea	CZ; BW	de Man 1890, De Coninck and Schuurmans-Stekhoven 1933, Allgén 1951, Soetaert et al. 1994, etc.
	Temperate South America	Magellanic	Patagonian Shelf	CZ	Pastor de Ward 1979
			Malvinas/Falklands	CZ	Allgén 1959
Xenocyatholaimus delamarei	Western Indo-Pacific	Western Indian Ocean	Southeast Madagascar	CZ	Gerlach 1953c
Xyzzors fitzgeraldae	Temperate Southern Africa	Benguela	Namaqua	CS	Inglis 1963
Xyzzors iubatus	Temperate Northern Atlantic	Warm Temperate Northwest Atlantic	Carolinian	CZ	Ott 1972
