# Supplementary material for: Diversity and Distribution of Cyatholaimidae (Chromadorida: Nematoda): A Taxonomic and Systematic Review of the World Records
Source: Frontiers journal article supplement (doi:10.3389/fmars.2022.836670), 2022-03-18
Supplement: Table_3.docx [file Table_3.docx]

**Supplementary Material 3:** List of the studies included in the systematic review of Cyatholaimidae family.

| **Author(s)** | **Title** | **Year** |
| --- | --- | --- |
| Adamson, M. L., and Marcogliese, D. J. | A possible instance of parasitism in a chromadorid nematode, *Cyatholaimus cirolanae* n. sp., from the marine isopod *Cirolana polita.* | 1994 |
| Allgén, C. A. | Neue freilebende marine Nematoden von der Westküste Schwedens. | 1929a |
| Allgén, C. A. | Südschwedische marine Nematoden. | 1929b |
| Allgén, C. A. | Freilebende marine Nematoden von der Stateninsel (Feuerland-Archipel). II | 1930 |
| Allgén, C. A. | Freilebende marine Nematoden aus dem Dröbakschnittes des Oslofjords. | 1931 |
| Allgén, C. A. | Freilebende nematoden aus dem Trondhjemsfjord. | 1933 |
| Allgén, C. A. | Freilebende marine Nematoden aus Hallands Väderö und der nahegelegenen Küste Schonens (Südschweden). Ein Beitrag zur Kenntnis der Nematoden-fauna des südlichen Kattegatts. | 1934 |
| Allgén, C. A. | Zur Kenntnis norwegischer Nematoden V. Weitere neue oder wenig bekannte freilebende Nematoden aus der Strandzone bei Tarva. | 1935 |
| Allgén, C. A. | Weitere freilebende Nematoden insbesondere aus dem Schalensand- und Kiesboden der Strandzone Norwegens. | 1940 |
| Allgén, C. A. | Über einige freilebende Nematoden aus Bandirma an der Nordküste Kleinasiens (Marmarameer, Türkei). | 1941 |
| Allgén, C. A. | Die freilebenden Nematoden des Mittelmeeres. | 1942 |
| Allgén, C. A. | Papers from Dr. Th. Mortensen's Pacific Expedition 1914-16. LXXV. West American Marine Nematode. | 1947a |
| Allgén, C. A. | Papers from Dr. Th. Mortensen's Pacific Expedition 1914-16 74. LXXIV. On some freeliving marine Nematodes from Tobago (Br. W. I.). | 1947b |
| Allgén, C. A. | Papers from Dr. Th. Mortensen's Pacific Expedition 1914-16. LXXVI. Pacific Freeliving Marine Nematodes. | 1951 |
| Allgén, C. A. | Revision der freilebenden marinen Nematoden aus der Umgebung der Staatlichen Zoologischen Station Kristineberg an der Westküste Schwedens. | 1953 |
| Allgén, C. A. | Freeliving marine nematodes. Further zoological results of the Swedish Antarctic expedition, 1901-1903 under the direction of Dr. Otto Nordenskjold | 1959 |
| Allouche, M. et al. | Experimental selection of *Marylynnia puncticaudata* (Cyatholaimidae, Nematoda) and effects of organic enrichment. | 2020 |
| Alongi, D. M. | Community dynamics of free-living nematodes in some tropical mangrove and sandflat habitat. | 1990 |
| Alongi, D. M., and Christoffersen, P. | Benthic infauna and organism-sediment relations in a shallow, tropical coastal area: influence of outwelled mangrove detritus and physical disturbance. | 1992 |
| Andrássy, I. | Nematoden aus Strand - und Höhlenbiotopen von Kuba. | 1973 |
| Annapurna, C. et al. | Free-living nematodes along the continental slope off northeast coast of India. | 2012 |
| Annapurna, C. et al. | Meiobenthic diversity off Pudimadaka, Bay of Bengal with special reference to free-living marine nematodes. | 2017 |
| Ansari, K. G. M. T. et al. | Checklist of nematodes (Nematoda: Adenophorea) from southeast Continental Shelf of India. | 2012 |
| Armenteros, M. et al. | Effects of chronic and heavy pollution on macro- and meiobenthos of Havana Bay, Cuba. | 2009a |
| Armenteros, M. et al. | Biodiversity patterns of free-living marine nematodes in a tropical bay: Cienfuegos, Caribbean Sea. | 2009b |
| Armenteros, M. et al. | Depth-related diversity patterns of free-living nematode assemblages on two tropical rocky shores. | 2014 |
| Aryuthaka, C. | Ecological studies on sediment meiofauna in a seagrass (*Zostera marina*) bed, with special reference to nematode. | 1985 |
| Austen, M. C., and Widdicombe, S. | Experimental evidence of effects of the heart urchin *Brissopsis lyrifera* on associated subtidal meiobenthic nematode communities. | 1998 |
| Bastian, H. C. | Monograph of the Anguillulidae, or Free Nematoids, Marine, Land, and Freshwater; with Descriptions of 100 New Species. | 1865 |
| Belogurova, L. S., and Maslennikov, S. I. | Meiobenthos under mariculture conditions of the brown seaweed *Saccharina japonica* in Rifovaya Bay, Peter the Great Gulf, Sea of Japan. | 2016 |
| Beyrem, H., and Aissa, P. | Evolution spatio - temporelle de la composition des peuplements de nematodes libres en reponse a la pollution petroliere sevissant dans la Baie de Bizerte. | 1998 |
| Bhanu, Ch. V. et al. | Functional diversity of nematode communities in the Nizampatnam Bay, Bay of Bengal. | 2017 |
| Blome, D. | Zur systematik von nematoden aus dem sandstrand der Nordseeinsel Sylt. | 1974 |
| Blome, D. et al. | Analysis of the small-scale spatial patterns of free-living marine nematodes from tidal flats in the East Frisian Wadden Sea. | 1999 |
| Boucher, G. | Nématodes des sables fins infralittoraux de la Pierre Noire (Manche occidentale) II. Chromadorida. | 1976 |
| Boucher, G. | Impact of Amoco Cadiz Oil Spill on intertidal and sublittoral meiofauna. | 1980 |
| Boufahja, F., and Beyrem, H. | Description of *Marylynnia puncticaudata* n. sp. (Nematoda, Cyatholaimidae) from Bizerte Lagoon, Tunisia. | 2014 |
| Boufahja, F., and Semprucci, F. | Stress-induced selection of a single species from an entire meiobenthic nematode assemblage: is this possible using iron enrichment and does pre-exposure affect the ease of the process? | 2015 |
| Boufahja, F. et al. | A microcosm experiment on the effects of permethrin on a free-living nematode assemblage. | 2011 |
| Boufahja, F. et al. | Experimental evidence of the effects of an antimitotic agent, Colchicine, on a nematode community through a microcosm approach | 2015 |
| Boufahja, F. et al. | An experimental protocol to select nematode species from an entire community using progressive sedimentary enrichment. | 2016 |
| Bouwman, L. A. | A survey of nematodes from the Ems Estuary Part I: Systematics. | 1981 |
| Bouwman, L. A. et al. | On the ecology of meiofauna in an organically polluted estuarine mudflat. | 1984 |
| Bovee, F. de. | *Metacyatholaimus effilatus* n. sp. especes nouvelle de Cyatholaimidae (Nematoda) de Bayuls-sur-Mer. | 1973 |
| Bovee, F. de. | Dynamics of sublittoral meiobenthic communities. II. The free-living marine nematodes communities. | 1988 |
| Boyd, S. E. et al. | Nematodes as sensitive indicators of change at dredged material disposal sites. | 2000 |
| Bresslau, E., and Schuurmans-Stekhoven, J. H. | Marine Freilebende Nematoda aus der Nordsee. | 1940 |
| Brunetti, B. | Contributo alla conoscenza dei Nematodi del M. Tirreno. II. Alcune specie appartenenti alle famiglie: Enoplidae, Cyatholaimidae, Chromadoridae, Axonolaimidae. | 1949 |
| Bussau, C. | Taxonomische und ökologische Untersuchungen an Nematoden des Peru-Beckens. | 1993 |
| Bütschli, O. | Zur Kenntnis der freilebenden Nematoden, insbesondere der des Kieler Hafens. | 1874 |
| Capstick, C. K. | The distribution of free-living nematodes in relation to salinity in the middle and upper reaches of the River Blyth Estuary. | 1959 |
| Chen, C.-A. et al. | Spatial distribution of tropical estuarine nematode communities in Sarawak, Malaysia (Borneo). | 2012 |
| Chen, C.-A. et al. | Two new free-living marine nematode species from an intertidal sandy-rocky shore on Pulau Ubin, Singapore with a key to the valid species  of the genera *Prooncholaimus* and *Acanthonchus.* | 2015 |
| Chinnadurai, G., and Fernando, O. J. | Meiofauna of mangroves of the southeast coast of India with special reference to the free-living marine nematode assemblage. | 2007 |
| Chitwood, B. G. | North American marine nematodes. | 1951 |
| Cidreira, G. et al. | A new species of *Pomponema* Cobb, 1917 (Nematoda: Cyatholaimidae) from Northeast of Brazil, with reference to the taxonomic status of the genera *Parapomponema* Ott, 1972 and *Propomponema* Ott, 1972. | 2019 |
| Cobb, N. A. | Australian free-living marine nematodes. | 1898 |
| Cobb, N. A. | The North American free-living fresh-water nematodes. | 1914 |
| Cobb, N. A. | Notes on Nemas. | 1917 |
| Cobb, N. A. | One hundred new nemas (type species of 100 new genera). | 1920 |
| Coles, J. W. | Two new species of marine nematodes from the British coast. | 1965 |
| Datta, T. K. et al. | *Cyathoshiva amaleshi* gen. n. sp. n. (Nematoda: Cyatholaimidae) from the coast of India. | 2016 |
| De Coninck, L. A. | De symmetrie-verhoudingen aan het vooreinde der (vrijlevende) Nematoden. | 1942 |
| De Coninck, L. A., and Schuurmans-Stekhoven, J. H. | The freeliving marine nemas of the Belgian Coast. II With general remarks on the structure and the system of nemas. | 1933 |
| De Man, J. G. | Contribution à la connaissance des Nématodes marins du Golf de Naples. | 1876 |
| De Man, J. G. | Die einheimischen, frei in der reinen Erde und im süßen Wasser lebende Nematoden monographisch bearbeitet. Vorläufiger Bericht und descriptiv-systematischer Theil. | 1880 |
| De Man, J. G. | Troisième note sur les nématodes libres de la mer du Nord et de la Manche. | 1889 |
| De Man, J. G. | Quatrième note sur les nématodes libres de la mer du Nord et de la Manche. | 1890 |
| De Man, J. G. | Sur quelques espèces nouvelles ou peu connues de nématodes libres habitant les côtes de la Zélande. | 1907 |
| De Man, J. G. | Vrijlevende Nematoden | 1922 |
| Deboutteville, C. D. | Eaux souterraines littorales de la cote catalane française (Mise au point faunistique). | 1954 |
| Deboutteville, C. D. et al. | Recherches sur la faune des eaux souterraines littorales du Golfe de Gascogne. Littoral des landes. | 1954 |
| Decraemer, W., and Coomans, A. | Scientific report on the belgian expedition to the Great Barrier Reef in 1967. Nematodes XIII. A description of four new species and a redescription of four known species from in and around mangroves on Lizard Island. | 1978a |
| Decraemer, W., and Coomans, A. | Scientific report on the belgian expedition to the Great Barrier Reef in 1967. Nematodes XII. ecological notes on the nematode fauna in and around mangroves on Lizard Island. | 1978b |
| Ditlevsen, H. | Marine freeliving nematodes from Danish waters. | 1919 |
| Ditlevsen, H. | Nematological notes. | 1922 |
| Ditlevsen, H. | Sur quelques Nématodes libres (Cotes de Bretagne et Rockall). | 1923 |
| Eberth, C. J. | Untersuchungen über Nematoden. | 1863 |
| Elena, R. R. et al. | Biodiversidad meiofaunal de las playas de Los Abrigos del Porís y de Los Cristianos en la isla de Tenerife. Estructura y dinámica de sus comunidades | 2006 |
| Ellis, J. R. et al. | The benthos and fish of offshore sandbank habitats in the southern North Sea. | 2011 |
| Eskin, R. A., and Coull, B. C. | Seasonal and three-year variability of meiobenthic nematode populations at two estuarine sites | 1987 |
| Fedyaeva, M. A., and Tchesunov, A.V. | Fine structure of midgut cells of some White Sea free-living nematodes | 2017 |
| Filipjev, I. N. | Free-living marine nematodes of the Sevastopol area. | 1918 |
| Filipjev, I. N. | Encore sur les Nématodes libres de la mer Noire. | 1922 |
| Filipjev, I. N. | Nematodes libres du bassin polaire | 1946 |
| Gagarin, V. G. | Some data on free-living nematodes from Kunashir (Kuril Islands, Russia) reservoirs | 2004 |
| Gagarin, V. G. | *Paracanthonchus multisupplementatus* sp. n. and *Cyatholaimus minor* sp. n. (Nematoda) from the coast of Vietnam | 2012 |
| Gagarin, V. G., and Klerman, A. K. | Two new species of free-living nematodes (Nematoda) from the Mediterranean Sea | 2008 |
| Gagarin, V. G., and Nguyen Vu Thanh | Free-living Nematodes from Mekong River Delta, Vietnam. | 2007 |
| Gagarin, V. G., and Nguyen Vu Thanh | A new genus and three new species of free-living nematodes from mangroves of the Red River Estuary, Vietnam. | 2008 |
| Gagarin, V. G., and & Nguyen Vu Thanh | Free-living nematodes of the Tra Ly River in the Red River Mouth, Vietnam. | 2012 |
| Gagarin, V. G., and & Nguyen Vu Thanh | *Longicyatholaimus orientalis* sp. n. (Nematoda,  Chromadorida, Cyatholaimidae) from mangrove  forest of Vietnam. | 2015 |
| Gagarin, V. G., and & Nguyen Vu Thanh | *Paracanthonchus brevicaudatus* sp. n. (Nematoda, Chromadorida, Cyatholaimidae) from artificial reservoirs in vietnam | 2016 |
| Galtsova, V. V. | Free-living marine nematodes as a component of the meiobenthos of Chupa Inlet of the White Sea | 1976 |
| Gee, J. M. et al. | Effects of organic enrichment on meiofaunal abundance and community structure in sublittoral soft sediments | 1985 |
| Gerlach, S. A. | Die Nematodenbesiedlung des Sandstrandes und des Küstengrundwassers an der italienischen Küste. I. - Systematischer Teil. | 1953a |
| Gerlach, S. A. | Freilebende marine Nematoden aus dem Küstengrundwasser und aus dem Brackwasser der Chilenischen Küste. | 1953b |
| Gerlach, S. A. | Recherches sur la faune des eaux interstitielles de Madagascar. III. Sur quelques Nématodes libres des eaux souterraines littorales de Madagascar. | 1953c |
| Gerlach, S. A. | Nouveaux nématodes libres des eaux souterraines littorales Françaises. | 1953d |
| Gerlach, S. A. | Les nématodes marins libres des eaux souterraines littorales d'Esposende (Portugal). | 1953e |
| Gerlach, S. A. | Contributions a l’étude de la faune souterraine littorale nematodes marins libres des eaux souterraines littorales de Tunisie et d’Algerie. | 1953f |
| Gerlach, S. A. | Die Nematodenfauna der Uferzone und des Küstengrundwassers am finnischen Meerbusen. | 1953g |
| Gerlach, S. A. | Die biozönotische gliederung der nematodenfauna an den Deutschen Küsten. | 1953h |
| Gerlach, S. A. | Nouveaux Nématodes libres des eaux souterraines littorales françaises. | 1954 |
| Gerlach, S. A. | Zur Kenntnis der freilebenden marinen Nematoden von San Salvador. | 1955 |
| Gerlach, S. A. | Diagnosen neuer Nematoden aus der Kieler Bucht. | 1956 |
| Gerlach, S. A. | Die Nematodenfauna des Sandstrandes an der Küste von Mittelbrasilien (Brasilianische Meerse-Nematoden IV). | 1957a |
| Gerlach, S. A. | Marine Nematoden aus dem Mangrove-Gebiet von Cananéia (Brasilianische Meeres-Nematoden III). | 1957b |
| Gerlach, S. A. | Marine nematoden von der Kongo - Mündung. | 1957c |
| Gerlach, S. A. | Die Nematodenfauna der sublitoralen Region in der Kieler Bucht. | 1958 |
| Gerlach, S. A. | Freilebende Nematoden aus dem Roten Meer. | 1964a |
| Gerlach, S. A. | Neue Cyatholaimidae (Nematoda Chromadorida) von den Malediven. | 1964b |
| Gerlach, S. A. | Über die Fauna in der Gezeitenzone von Spitzbergen. | 1965 |
| Gerlach, S. A. | Freilebende Meeres-Nematoden von den Sarso-Inseln (Rotes Meer). | 1967 |
| Gerlach, S. A. | Attraction to decaying organisms as a possible cause for patchy distribution of nematodes in a Bermuda beach. | 1977 |
| Gheskiere, T. et al. | The sandy beach meiofauna and free-living nematodes from De Panne (Belgium). | 2002 |
| Ghosh, M. et al. | Impact of unusual monsoonal rainfall in structuring meiobenthic assemblages at Sundarban estuarine system, India. | 2018 |
| Gourbault, N. | Nématodes abyssaux (Campagne Walda du N/O "Jean Charcot"). I. Espèces nouvelles de Cyatholaimidae. | 1980 |
| Gusakov, V. A., and Gagarin, V. G. | Meiobenthos composition and structure in highly mineralized tributaries of Lake El’ton. | 2012 |
| Hanafy, M. H. et al. | Seasonal distribution of the littoral interstitial meiofauna in the northern Red Sea, Egypt | 2011 |
| Hedfi, A. et al. | Effects of increasing levels of nickel contamination on structure of offshore nematode communities in experimental microcosm | 2007 |
| Hopper, B. E. | Free-living marine nematodes from Biscayne Bay, Florida IV. Cyatholaimidae: On the occurrence of *Marilynia* n. gen. and *Longicyatholaimus* Micoletzky, 1924 in Biscayne Bay, with a description of *L. longicaudatus* De Man, 1876) from the type locality. | 1972 |
| Hopper, B. E., and Meyers, S. P. | Aspects of the life cycle of marine nematodes. | 1966 |
| Hopper, B. E., and Meyers, S. P. | Foliicolous marine nematodes on turtle grass, *Thalassia testudinum* König, in Biscayne Bay, Florida. | 1967 |
| Hourston, M. et al. | Spatial and seasonal variations in the ecological characteristics of the free-living nematode assemblages in a large microtidal estuary. | 2009 |
| Hourston, M. et al. | The characteristics of the nematode faunas in subtidal sediments of a large microtidal estuary and nearshore coastal waters differ markedly. | 2011 |
| Huang, Y., and Sun, J. | Two new free-living marine nematode species of the genus *Paramarylynnia* (Chromadorida: Cyatholaimidae) from the Yellow Sea, China. | 2011 |
| Huang, Y., and Xu, K. | Two new free-living nematode species (Nematoda: Cyatholaimidae) from intertidal sediments of the Yellow Sea, China. | 2013 |
| Huang, Y., and Zhang, Z. | A new genus and new species of free-living marine nematodes from the Yellow Sea, China. | 2007 |
| Inglis, W. G. | Three species of *Cyatholaimus* Bastian, 1865 (Nematoda: free-living: marine). | 1961 |
| Inglis, W. G. | Marine nematodes from Banyuls-sur-mer: with a review of the genus *Eurystomina*. | 1962 |
| Inglis, W. G. | New marine nematodes from off the coast of South Africa. | 1963 |
| Inglis, W. G. | Cyatholaimidae (Nematoda) from the coast of Western Australia. | 1970 |
| Jensen, P. | Meiofaunal abundance and vertical zonation in a sublittoral soft bottom, with a test of the Haps corer. | 1983 |
| Jensen, P. | The nematode fauna in the sulphide-rich brine seep and adjacent bottoms of the East Flower Garden, NW Gulf of Mexico. 1. Chromadorida. | 1985 |
| Jensen, P. | Nematode fauna in the sulphide-rich brine seep and adjacent bottoms of the East Flower Garden, NW Gulf of Mexico. IV. Ecological aspects. | 1986 |
| Jensen, P. | Predatory nematodes from the deep-sea: description of species from the Norwegian Sea, diversity of feeding types and geographical distribution. | 1992 |
| Jouili, S. et al. | Inventory of the free–living marine nematode species from el Bibane Lagoon (Tunisia). | 2018 |
| Kennedy, A. D. | Carbon partitioning within meiobenthic  nematode communities in the Exe Estuary, UK. | 1994 |
| Kim, H. et al. | A new species of the genus *Marylynnia* (Nematoda:  Chromadorida: Cyatholaimidae) from Gwangyang Bay, Korea. | 2015 |
| Kito, K. | Studies on the free-living marine nematodes from Hokkaido, I. | 1976 |
| Kito, K. | Studies on the free-living marine nematodes from Hokkaido, IV. | 1981 |
| Kito, K. | Phytal marine nematode assemblage on *Sargassum*  *confusum* Agardh, with reference to the structure  and seasonal fluctuations. | 1982 |
| Kotta, J., and Boucher, G. | Interregional variation of free-living nematode assemblages in tropical coral sands. | 2001 |
| Kreis, H. A. | Zur Kenntnis der freilebenden marinen Nematoden. | 1924 |
| Kreis, H. A. | Weiterer Beitrag zur Kenntnis der freilebenden marinen Nematoden. | 1926 |
| Kreis, H. A. | Die freilebenden marinen Nematoden der Spitzbergen-Expedition von F. Roemer und F. Schaudinn im Jahre 1898. | 1928 |
| Kreis, H. A. | Marine Nematoda. | 1963 |
| Krishnapriya, P. P. et al. | Inter fjord variations as a key contributor in the meiobenthic faunal distribution in the Arctic Kongsfjord, Svalbard. | 2019 |
| Kumary, K. S. A. | Diversity of meiobenthic nematodes in the Poonthura estuary (southwest coast of India). | 2008 |
| Lambshead, P. J. D. | Sub-catastrophic sewage and industrial waste  contamination as revealed by marine nematode  faunal analysis. | 1986 |
| Lampadariou, N., and Eleftheriou, A. | Seasonal dynamics of meiofauna from the oligotrophic continental shelf of Crete (Aegean Sea, eastern Mediterranean). | 2018 |
| Leduc, D., and Zhao, Z. Q. | Phylogenetic relationships within the Cyatholaimidae (Nematoda: Chromadorida), the taxonomic significance of cuticle pore and pore-like structures, and a description of two new species. | 2016 |
| Lee, H. J. et al. | Two unrecorded marine nematode species of *Paracanthonchus* (Nematoda: Cyatholaimidae) from the East Sea of Korea. | 2016 |
| Leonardis, C. de et al. | Meiobenthos and nematode communities in the Venice lagoon. | 2008 |
| Long, S. M. | The impact of pollution on the nematode and harpacticoid copepod species composition of an estuarine mudflat. | 1990 |
| Long, S. M., and Ross, O. B. H. | Vertical distribution of nematodes (Nematoda) and harpacticoid copepods (Copepoda: Harpacticoida) in muddy and sandy bottom of intertidal zone at Lok Kawi, Sabah, Malaysi. | 1999 |
| Long, S. M., and Ross, O. B. H. | Horizontal distribution of intertidal nematode from Sabah, Malaysia. | 2008 |
| Loof, P. A. A. | The nematode collection of Dr. J.G. de Man. | 1961 |
| López-Cánovas, C. I., and Pastor de Ward, C. | Lista de los nemátodos (Adenophorea: Chromadoria,  Enoplia) de los pastos marinos del Archipiélago de  Sabana-Camagüey, Cuba. | 2006 |
| Lorenzen, S. | Freilebende meeresnematoden aus dem schlick watt  und den salzwiesen der nordseeküste. | 1969 |
| Lorenzen, S. | Die nematodenfauna im verklappungsgebiet für industrieabwässer nordwestlich von Helgoland: III. Cyatholaimidae, mit einer Revision von *Pomponema* Cobb, 1917. | 1972 |
| Lorenzen, S. | Die nematodenfauna der sublitoralen region der Deutschen Bucht, insbesondere im Titan-Abwassergebiet bei Helgoland. | 1974 |
| Mahmoudi, E. et al. | Response of free-living Nematodes to the quality of water and sediment at Bou Chrara Lagoon (Tunisia) during winter 2000. | 2002 |
| Mahmoudi, E. et al. | Mussel-farming effects on Mediterranean benthic  nematode communities. | 2008 |
| Marion, M. A. F. | Recherches zoologiques et anatomiques sur des  nématoïdes non parasites, marins. | 1870 |
| Mawson, P. M. | Some marine freeliving nematodes from the Australian coast. | 1953 |
| McCloskey, L. R. | The dynamics of the community associated  with a marine scleractinian coral. | 1970 |
| Meyl, A. H. | Beiträge zur kenntnis der nematodenfauna vulkanisch erhitzter biotope. III. Mitteilung. Nematoden aus der Mischungszone strandnaher, heisser Süßwasserquellen mit dem Meerwasser auf der Insel Ischia. | 1954 |
| Meyl, A. H. | Nematoden aus einer Salzwiese bei Artern. | 1955 |
| Micoletzky, H. | Neue freilebende Nematoden aus Suez. | 1922 |
| Micoletzky, H. | Letzter Bericht über freilebende Nematoden aus Suez. Sitzungsberichte der Akademie der Wissenschaften in Wien. | 1924 |
| Miljutina, M. A., and Miljutin, D. M. | A revision of the genus *Paracanthonchus* (Cyatholaimidae, Nematoda) with a tabular key to species and a description of *P. mamubiae* sp. n. from the deep North-Western Pacific. | 2015 |
| Milovankina, A. A. et al. | Salinity gradient meiobenthos distribution on the Razdolnaya river’s estuary. | 2018 |
| Mirto, S. et al. | Nematode assemblage response to fish-farm  impact in vegetated (*Posidonia oceanica*) and  non-vegetated habitats. | 2014 |
| Moens, T. et al. | Diatom feeding across trophic guilds in tidal flat nematodes, and the importance of diatom cell size. | 2013 |
| Moore, P. G. | The kelp fauna of northeast Britain. II. Multivariate classification: turbidity as an ecological factor. | 1973 |
| Mudie, P. J. | Palynomorphs in surface sediments of the North-Western Black Sea as indicators of environmental conditions. | 2020 |
| Murphy, D. G. | A new genus and two new species of nematodes from Newport, Oregon. | 1963 |
| Murphy, D. G. | An initial report on a collection of Chilean marine nematodes. | 1966 |
| Nasri, A. et al. | Impact of penicillin G on the trophic diversity (Moens & Vincx, 1997) of marine nematode community: results from microcosm experiments. | 2015 |
| Nasira, K. et al. | Two new species of free-living marine nematodes of the family Cytaholaimidae (Nematoda: Chromadorida) from the Arabian sea of Pakistan. | 2007 |
| Nasira, K. et al. | Response of free-living marine nematode community to heavy metal contamination along the coastal areas of Sindh and Balochistan, Pakistan. | 2010 |
| Nicholas, W. L. et al. | The nematode fauna of the Murray River estuary, South Australia; the effects of the barrages across its mouth. | 1992 |
| Novak, R. | Ecology of nematodes in the mediterranean seagrass  *Posidonia oceanica* (L.) DELILE 1. General part and faunistics of the nematode community. | 1989 |
| Nzeako, S. O. et al. | Characterization of the soil nematode fauna of Makerere Hill, Kampala, Uganda. | 2019 |
| Ocaña, A. et al. | First record of nematode species in continental water from Spain: taxonomic and ecological considerations. | 1990 |
| Oliveira, D. A. S. De et al. | Low genetic but high morphological variation over more than 1000 km coastline refutes omnipresence of cryptic diversity in marine nematodes. | 2017 |
| Ott, J. A. | Vertikalverteilung von Nematoden in Best inden  nordadriatischer Sargassaceen. | 1967 |
| Ott, J. A. | Twelve new species of nematodes from an intertidal sandflat in North Carolina. | 1972 |
| Otto, G. | Die fauna der Enteromorphazone der Kieler Bucht. | 1936 |
| Paetzold, D. | Beitrage zur Nematodenfauna mitteldeutscher Salzstellen im Raum von Halle. | 1958 |
| Palacín, C. | Nematodos marinos de las algas fotofilas del litoral de Menorca II. Chromadorida y Monhysterida. | 1985 |
| Palacín, C. et al. | Evidence for coincidence of meiofauna spatial heterogeneity with eutrophication processes in a shallow-water Mediterranean bay. | 1992 |
| Pastor de Ward, C. T. | Free-living marine nematodes (Subclass Adenophorea) of the ria Deseado (Santa Cruz, Argentina). Systematic contributions I. | 1979 |
| Pastor de Ward, C. T. | Free-living marine nematodes of the Deseado river estuary (Chromadoroidea: Chromadoridae, Ethmolaimidae, Cyatholaimidae and Choniolaimidae) Santa Cruz, Argentina. 5. | 1985 |
| Pastor de Ward, C. T. | A new nematode from West Patagonian coasts, *Biarmifer madrynensis* sp. n., with a redefinition of the genus *Biarmifer* Wieser 1954 (Nematoda: Cyatholaimidae). | 2001 |
| Pastor de Ward, C. T. et al. | Free-living marine nematodes from San Julián Bay  (Santa Cruz, Argentina). | 2015 |
| Pavlyuk, O. N. | Seasonal dynamics of the population density of mass species and trophic groups of free-living marine nematodes. | 2000 |
| Pavlyuk, O. N. et al. | Effect of the Razdol’naya River on structure of the free-living nematode community of the Amursky Bay, Sea of Japan. | 2007 |
| Pavlyuk, O. N. et al. | Spatial and temporal changes in nematode  assemblages inhabiting a seagrass biotope in the  Tien Yen River estuary, Quang Ninh Province,  Vietnam. | 2020 |
| Pavlyuk, O. N., and Trebukhova, J. A. | Composition and distribution of meiobenthos in Amursky Bay (Peter the Great Bay, the East Sea). | 2005 |
| Pearse, A. S. et al. | Ecology of sand beaches at Beaufort, N. C. | 1942 |
| Pérez-García, J. A. et al. | Spatial distribution of nematode assemblages  in Cienfuegos Bay (Caribbean Sea), and their relationships with sedimentary environment. | 2009 |
| Pérez-García, J. A. et al. | Does morphology of host marine macroalgae drive  the ecological structure of epiphytic meiofauna? | 2015 |
| Pérez-García, J. A. et al. | Persistent impacts on the free-living nematode  assemblages in Havana Bay: Comparative analysis  between 2006 and 2016. | 2019 |
| Pérez-García, J. A. et al. | A checklist of aquatic nematodes from Cuban Archipelago. | 2020 |
| Platonova, T. A. | New species of free-living nematodes from the White Sea *Pomponema golikovi* sp. n. (Nematoda, Chromadorida). | 1988 |
| Platt, H. M. | Freeliving marine nematodes from Strangford Lough, Northern Ireland. | 1973 |
| Platt, H. M., and Warwick, R. M. | Free-living Marine Nematodes Part II, British Chromadorids. Synopses of the British Fauna (New Series). | 1988 |
| Rao, G. C., and Ganapati P. N. | The interstitial fauna inhabiting the beach sands of Waltair Coast. | 1968 |
| Reynolds, P., and Finney-Crawley, J. R. | A survey of nematode fauna associated with some  marine algae in Newfoundland. | 1999 |
| Riemann, F. | Die interstitielle fauna im Elbe-Aestuar. | 1966 |
| Riemann, F. | Frelebende Nematoden aus dem Grenzbereich Meer-Süss-Wasser in Kolumbien, Südamerika. | 1970 |
| Riemann, F. | Marine nematode (Chromadorida) with fin-like alae and dorsoventral body flattening. | 1976 |
| Riemann, F., and Rachor, E. | Freilebende nematoden aus dem Suezkanal. | 1972 |
| Ruiz-Abierno, A., and Armenteros, M. | Coral reef habitats strongly influence the diversity of macro- and meiobenthos in the Caribbean. | 2016 |
| Sajan, S., and Damodaran, R. | Faunal composition of meiobenthos from the shelf regions off the west coast of India. | 2007 |
| Salma, J. et al. | Morphological and molecular identification of four new species of marine nematodes | 2017 |
| Schiemer, F. et al. | Ecology and systematics of free-living nematodes from the Bothnian Bay, northern Baltic Sea. | 1983 |
| Schneider, G. | Dritter beitrag zur Kenntnis der brackwasser-nematoden Finlands. | 1927 |
| Schratzberger, M. et al. | Functional diversity of nematode communities  in the southwestern North Sea. | 2007 |
| Schulz, E. | Beiträge zur Kenntnis mariner Nematoden aus der Kieler Bucht. | 1932 |
| Schuurmans-Stekhoven, J. H. Jr. | Ökologische und morphologische Notizen über Zuiderseenematoden. I. Die westliche Hälfte der Zuidersee. | 1931 |
| Schuurmans-Stekhoven, J. H. Jr. | Freeliving Marine Nemas of the Belgian Coast. I. and II. | 1935 |
| Schuurmans-Stekhoven, J. H. Jr. | The free living nematodes of the Mediterranean. III. The Balearic Islands. | 1942 |
| Schuurmans-Stekhoven, J. H. Jr. | Freilebende marine Nematoden des Mittelmeeres. IV. Freilebende marine Nematoden der Fischereigründe bei Alexandrien. | 1943 |
| Schuurmans-Stekhoven, J. H. Jr. | Freilebende marine Nematoden des Skagerraks und der Umgebung von Stocklholm. | 1946 |
| Schuurmans-Stekhoven, J. H. Jr. | The freeliving marine nemas of the Mediterranean: I. The Bay of Villefranche. | 1950 |
| Schuurmans-Stekhoven, J. H. Jr. | IX. Vrijlevende Nematoden. | 1954 |
| Schuurmans-Stekhoven, J. H. Jr., and Adam, W. | The freeliving marine nemas of the Belgian coast. | 1931 |
| Semprucci, F. | Marine nematodes from the shallow subtidal coast of the Adriatic Sea: Species list and distribution | 2013 |
| Semprucci, F., and Balsamo, M. | New records and distribution of marine free-living nematodes in the Maldivian Archipelago | 2014 |
| Semprucci, F., and Burattini, S. | Re-description of *Craspodema reflectans* (Nematoda, Cyatholaimidae) using confocal laser scanning microscopy. | 2015 |
| Semprucci, F. et al. | The nematode assemblage of a coastal lagoon  (Lake Varano, southern Italy): ecology and biodiversity patterns. | 2014 |
| Sergeeva, N. G. | Meiobenthic nematodes at the deep oxic/anoxic boundary of the Black Sea (Istanbul Strait Outlet Area) with new records for Turkey. | 2021 |
| Shadrin, N. et al. | Do separated taxa react differently to a long-term salinity increase? The meiobenthos changes in Bay Sivash, largest hypersaline lagoon worldwide. | 2019 |
| Sharma, J., and Vincx, M. | Cyatholaimidae (Nematoda) from the Canadian Pacific coast. | 1982 |
| Sharma, J., and Webster, J. M. | The abundance and distribution of free-living nematodes from two Canadian Pacific beaches. | 1983 |
| Soetaert, K. et al. | Spatial patterns of Westerschelde meiobenthos. | 1994 |
| Somerfield, P. J. et al. | Soft sediment meiofaunal community structure in  relation to a long-term heavy metal gradient in  the Fal estuary system. | 1994 |
| Somerfield, P. J. et al. | Three-dimensional spatial structure: nematodes in a sandy tidal flat. | 2007 |
| Southern, R. | Nemathelmia, Kinorhyncha, and Chaetognatha. | 1914 |
| Steiner, G. | Freilebende Nematoden aus der Barentssee. | 1916 |
| Steiner, G. | Ost-asiatische marine Nematoden. | 1921 |
| Steyaert, M. et al. | Tidal migration of nematodes on an estuarine tidal flat (the Molenplaat, Schelde Estuary, SW Netherlands). | 2001 |
| Steyaert, M. et al. | Responses of intertidal nematodes to short-term anoxic events. | 2007 |
| Taheri, M. et al. | Effect of short-term hypoxia on marine nematode community structure and vertical distribution pattern in three different sediment types of the North Sea. | 2014 |
| Taheri, M. et al. | Patterns in nematode community during and after experimentally induced anoxia in the northern Adriatic Sea. | 2015 |
| Tchesunov, A.V. | Three new species of free-living nematodes from the South-East Atlantic Abyss (DIVA I Expedition). | 2008 |
| Tchesunov, A.V. | Free-living nematode species (Nematoda) dwelling in hydrothermal sites of the North Mid-Atlantic Ridge. | 2015 |
| Tietjen, J. H. | Ecology and distribution of deep-sea meiobenthos off North Carolina. | 1971 |
| Tietjen, J. H. | Distribution and species diversity of deep-sea nematodes off North Carolina. | 1976 |
| Tietjen, J. H. | Population distribution and structure of the free-living nematodes of Long Island Sound. | 1977 |
| Timm, R. W. | The marine nematodes of the Bay of Bengal. | 1961 |
| Tita, G. et al. | Size spectra, body width and morphotypes of intertidal nematodes: an ecological interpretation. | 1999 |
| Tita, G. et al. | Intertidal meiofauna of the St Lawrence estuary (Quebec, Canada): diversity, biomass and feeding structure of nematode assemblages. | 2002 |
| Turpeenniemi, N. K. et al. | A new genus, five new and five known species of free-living marine nematodes (Nematoda: Monhysterida; Chromadorida) from Arabian Sea of Pakistan. | 2001 |
| Urban-Malinga, B. et al. | Effects of various bivalves on meiobenthic and nematode assemblages in shallow sandy sediments. | 2016 |
| Vadhyar, K. J. | A new species of *Paracanthonchus* Micoletzky, 1924 and a known species of *Paracyatholaimus* Micoletzky, 1922 (Nematoda, Cyatholaimidae, Paracanthonchinae) from polluted intertidal sand in Scotland. | 1980 |
| Vanaverbeke, J. et al. | Nematode assemblages from subtidal sandbanks in the Southern Bight of the North Sea: effect of small sedimentological differences. | 2002 |
| Vidakovic, J. | Meio- and nematofauna from Rasa Bay (North Adriatic Sea, Yugoslavia). | 1988 |
| Vidakovic, J. et al. | Two new species of the genus *Metacyatholaimus* (Nematoda, Cyatholaimidae) from the Adriatic Sea with a key to the species. | 2003 |
| Villares, G. et al. | Free-living marine nematodes from San Antonio Bay  (Río Negro, Argentina). | 2016 |
| Vinciguerra, M. T., and Zullini, A. | Nematodes from Italian sand dunes. 2. Four new and a rare species of Chromadorida. | 1997 |
| Vincx, M. | New and little-known nematodes from the North Sea. | 1981 |
| Vincx, M. et al. | On the identity and nomenclature of *Paracanthonchus caecus* (Bastian, 1865), with a redefinition of the genus *Paracanthonchus* Micoletzky (Nematoda, Cyatholaimidae). | 1982 |
| Vincx, M. et al. | The distribution of Nematodes communities in the Southern Bight of the North Sea. | 1990 |
| Vitiello, P. | Nematodes libres marins des vases profondes du Golfe du Lion. II. Chromadorida. | 1970 |
| Vitiello, P. | Nématodes nouveaux des vases terrigènes cotières des côtes provençales. | 1971 |
| Vitiello, P., and Aissa, P. | Structure des peuplements de Nématodes en milieu lagunaire pollué. | 1985 |
| Vitiello, P., and Boucher, G. | Nouvelles espèces de Chromadorida (Nematoda) des vases terrigènes méditerranéennes. | 1971 |
| Vorobyova, L. et al. | Meiofauna of the periphytal of the Odessa coast, Ukraine. | 2016 |
| Wakkaf, T. et al. | The individual and combined effects of cadmium, polyvinyl chloride (PVC) microplastics and their polyalkylamines modified forms on meiobenthic features in a microcosm. | 2020 |
| Wall, J. W. et al. | Nematode community and trophic structure along  a sand dune succession. | 2002 |
| Warwick, R. M. | Fourteen new species of free-living marine nematodes from the Exe estuary. | 1970 |
| Warwick, R. M. | Nematode associations in the Exe estuary. | 1971a |
| Warwick, R. M. | The Cyatholaimidae (Nematoda, Chromadoroidea) off the coast of Northumberland. | 1971b |
| Warwick, R. M. et al. | Freeliving nematodes from the Salton Sea. | 2002 |
| Warwick, R. M., and Gee, J.M. | Community structure of estuarine meiobenthos. | 1984 |
| Wieser, W. | Untersuchungen über die algenbewohnende  Mikrofauna mariner Hartböden. I. Zur oekologie und systematik der nematodenfauna von Plymouth. | 1951 |
| Wieser, W. | Free-living marine nematodes II. Chromadoroidea. | 1954a |
| Wieser, W. | Beiträge zur Kenntnis der Nematoden submariner Höhlen. Ergebnisse der österreichischen Tyrrhenia-Expedition 1952, Teil II. | 1954b |
| Wieser, W. | A collection of marine nematodes from Japan. | 1955 |
| Wieser, W. | Free-living nematodes and other small invertebrates of Puget Sound beaches. | 1959 |
| Wieser, W. | Benthic studies in Buzzards Bay. II. The meiofauna. | 1960 |
| Wieser, W., and Hopper, B. | Marine nematodes of the east coast of North America. I. Florida Bull. | 1967 |
| Willems, K. A. et al. | Long-term evolution of the meiofauna at a sandy station in lake Grevelingen, The Netherlands. | 1984 |
| Wright, K. A., and Hope, W. D. | Elaborations of the cuticle of *Acanthonchus duplicatus* Wieser, 1959 (Nematoda: Cyatholaimidae) as revealed by light and electron microscopy. | 1968 |
| Zhinan, Z. et al. | Phytal meiofauna of a rocky shore at the Cape d'Aguilar marine reserve, Hong Kong. | 1997 |
| Zograf, Yu. K., and Yushin, V. V. | Ultrastructural study of spermatogenesis  in the free-living marine nematode  *Paracyatholaimus pugettensis* Wieser and Hopper, 1967 (Chromadorida: Cyatholaimidae). | 2004 |
